# Supplementary material for: Synthesis, Characterization, and Antifungal Studies of Cr(III) Complex of Norfloxacin and Bipiridyl Ligand
Source: Hindawi journal article supplement (doi:10.1155/2014/457478), 2014-01-01
Supplement: f1 [file 457478.f1.zip]

Supplementary material file

**Synthesis, Characterization and Antifungal Studies of Cr(III) complex of Norfloxacin and Bipyridyl Ligand**

Debnath Anamika<sup>a</sup>, Hussain Firasat<sup>a</sup> and Masram Dhanraj T.<sup>a\*</sup>

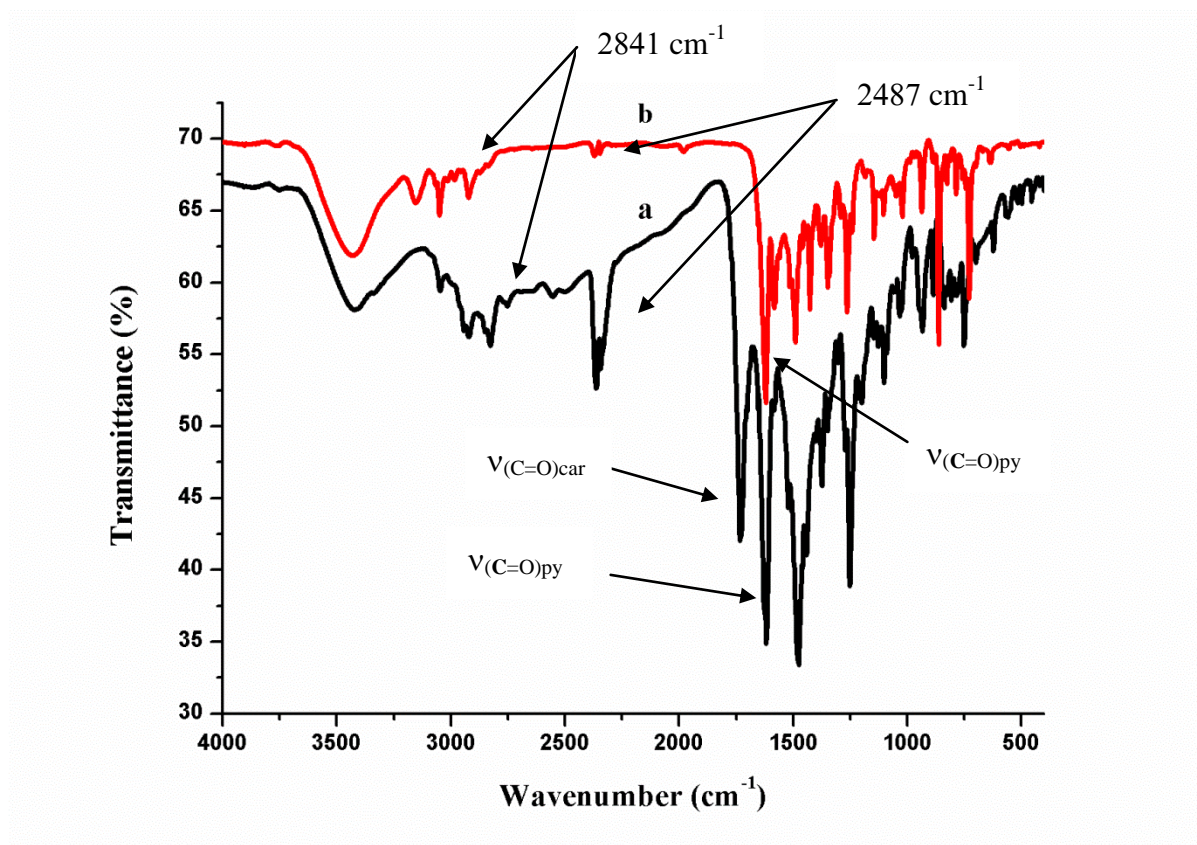

**S1: FT-IR spectra of (a) Nor and (b) [Cr(Nor)(Bipy)Cl<sub>2</sub>]Cl.2CH<sub>3</sub>OH**

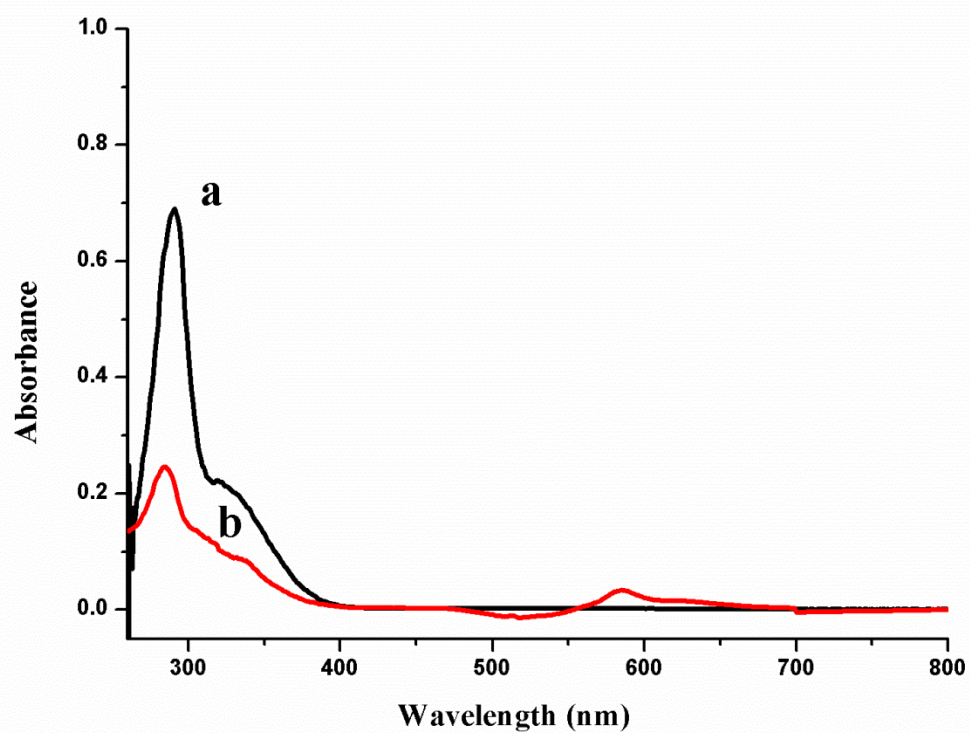

**S2: Electronic spectra of (a) Nor and (b)  $[\text{Cr}(\text{Nor})(\text{Bipy})\text{Cl}_2]\text{Cl} \cdot 2\text{CH}_3\text{OH}$**
