# Supplementary material for: Synthesis, Characterization, and Antifungal Studies of Cr(III) Complex of Norfloxacin and Bipiridyl Ligand
Source: Bioinorg Chem Appl. 2014 Sep 3;2014:457478. doi: 10.1155/2014/457478 (PMC4168151; doi:10.1155/2014/457478)
Supplement: Supplementary file 1 — S1: FT-IR spectra of (a) Nor and (b) [Cr(Nor)(Bipy)Cl2]Cl.2CH3OH S2: Electronic spectra of (a) Nor and (b) [Cr(Nor)(Bipy)Cl2]Cl.2CH3OH [file 457478.f1.zip]

Archive with 2 entries (2 files):
- mat.457478.v2.pdf
- suppl. description.docx
